# Supplementary material for: Additive nanocomplexes of cationic lipopolymers for improved non-viral gene delivery to mesenchymal stem cells
Source: Royal Society of Chemistry journal article supplement (doi:10.1039/c4tb02101k), 2015-01-01
Supplement: c4tb02101k1.pdf [file c4tb02101k1.pdf]

## SUPPORTING INFORMATION

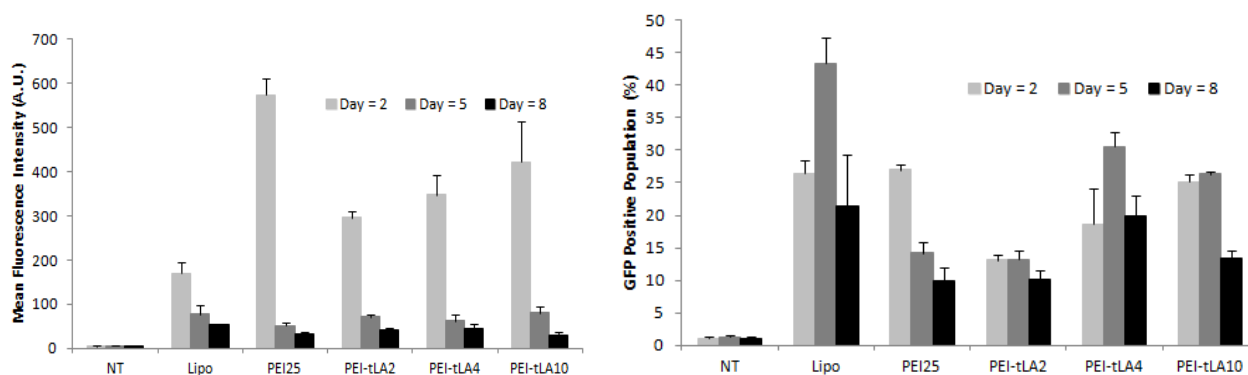

**Fig. S1.** GFP expression in UCB-MSCs cells as quantified through flow cytometry as a function of post-transfection time (i.e., 2, 5 and 8 days after complex addition) after incubation with the complexes. Mean GFP fluorescence intensity per cell is shown in **(Left)** and GFP-positive cell population is shown in **(Right)**.

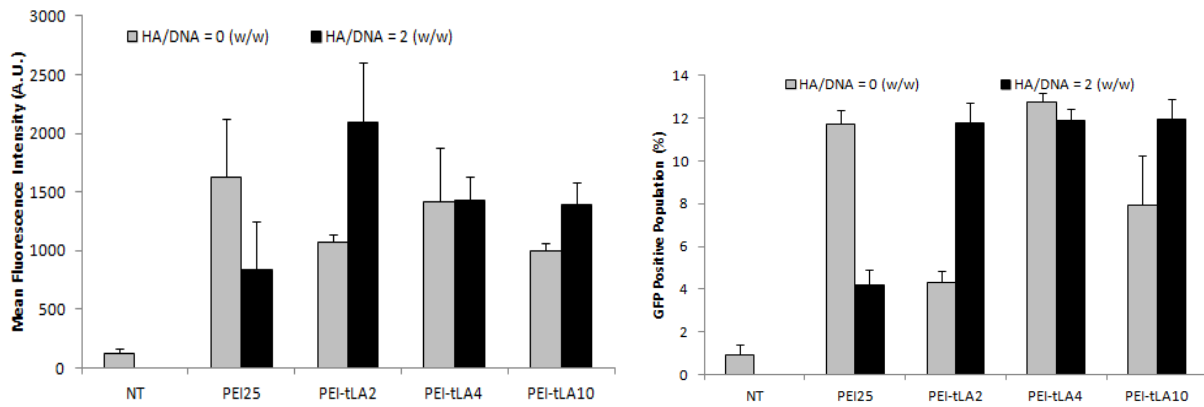

**Fig. S2.** GFP expression in hBM-MSC as quantified through flow cytometry as a function of HA content after 48 hr. of incubation with complexes. Mean GFP fluorescence intensity per cell is shown in (**Left**) and GFP-positive cell population is shown in (**Right**).

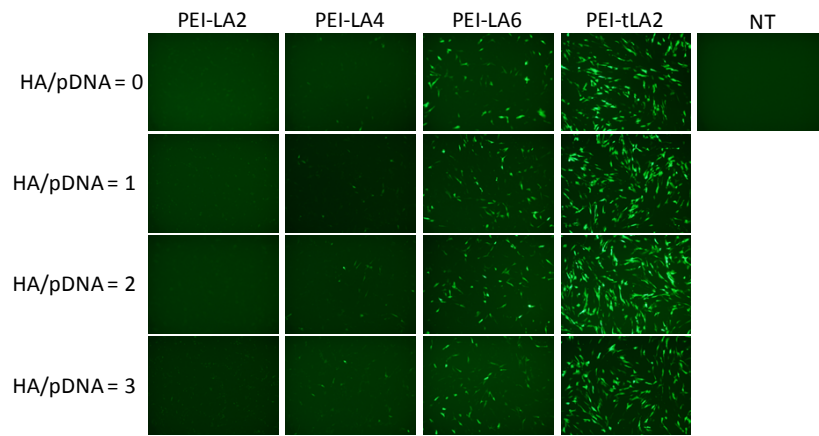

**Fig. S3.** Fluorescence micrographs of UCB-MSC treated with the complexes, cells were treated with the complexes for 4 hr. then with fresh medium for 48 hr. before microscopic analysis. The complexes were prepared by incubating DNA with the polymers, PEI-LA2 (substitution = 1.4 lipids/polymers), PEI-LA4 (substitution = 1.8 lipids/polymer), PEI-LA6 (substitution = 2.3 lipids/polymer) and PEI-tLA2 (Substitution = 1.3 lipids/polymer). NT represents the cells treated with medium without any complexes. The original magnification of the images is 10X.
